# Supplementary material for: Empowering 5th Graders for a Vape- and Smoke-Free Future: Intervention Development and Randomized Controlled Trial
Source: Research Square preprint supplement (doi:10.21203/rs.3.rs-6227852/v1), 2025-04-18
Supplement: Supplementary file 2 [file ac907524fb928ba386f03a1a.docx]

**Additional file 1**

**Table 1**

*Results of interviews and surveys in the program development study and implications for the program design.*

| Topic | Observation/Learning | Implications |
| --- | --- | --- |
| Organizational capacity/ characteristics of the setting | We found a highly diverse student body regarding migration status, spoken languages, and religion (i.e., 60% first/second generation immigrants; 50% reporting a language other than German as most spoken at home; most common religious denominations are Islam (43%) and Christianity (13%), (SQB).  Social problems were evident in a number of students’ families, including economic deprivation, family conflicts, drug and alcohol abuse, and lack of parental support for their schooling) (SBE, EI, SQB).  There is a severe shortage of teaching staff, resulting in frequent cancellation of classes (EI, SQ). A large number of students have low levels of reading and German language competence, creating a great need to support students individually (SBE, SMR, EI, SQB); all students fell further behind the curriculum during school closures in the COVID-19 pandemic (EI). Although smoking prevention is expected to be part of the regular (“framework”) curriculum, it is frequently neglected by teachers due to time constraints (EI). Teachers and governmental coordinators expected that many teachers would not be able to make additional efforts beyond their already demanding everyday responsibilities (EI). They strongly welcomed the external support for smoking prevention as an alternative to teachers being provided with manuals or training to implement it themselves (EI). | Given the extremely demanding conditions in the target setting, any additional burden for school staff needs to be minimized. The training program should be conducted by instructors from our study team and limited to a maximum of three sessions to avoid overloading the curriculum. |
| Smoking behavior in the target group; salient positive and negative beliefs about being vape- and smoke-free, sources of normative influence, and enablers/barriers | The age at which students begin smoking or vaping varied between schools, with some cases reported as early as second grade and regular use beginning in grades 5-6 (SBE, EI, SQB). In our feasibility study, lifetime prevalence for smoking/vaping was 11.96%, (mean age *M* = 11.74, 53% female) (SQB).  Students were frequently exposed to smoking/vaping in various environments, including public spaces, family settings (such as through siblings, parents, and cousins) and near school ground (such as through other students and teachers). Additionally, they were frequently exposed to online content related to e-cigarettes/vaping, often promotional posts created by influencers on social media (TikTok/Twitch/Snapchat, in particular) (SBE, SMR, EI, SQB).  Key barriers to being vape- and smoke-free identified during the student interviews were: Wishing to belong with a group or be cool, being put under pressure or scared or otherwise bullied, being in trouble/stressed and craving stress relief (SBE). Key enablers were knowing about health consequence effects on fitness and potential addiction, family expectations, associated costs, smell, finding smoking unpleasant, wishing to belong to a group of friends who do not vape and smoke (SBE).  Students perceived cigarettes as less attractive due to their odor, cost, and negative health effects (SBE, SQB). In contrast, vapes were often perceived as highly attractive due to their sweet flavors, colorful appearance, low cost, and easy accessibility (SBE, SQB). Many students who strongly refused to smoke cigarettes found vapes highly tempting (SBE). Although most students had at least some knowledge about the health consequences of smoking traditional cigarettes, there was significant uncertainty and doubt about the potential harm of vaping (SBE, SQB). | Prevention efforts should begin as early as fifth grade and should have a strong focus on vaping and e-cigarette use.  The program's design should prioritize the cultivation of children's competencies in the following domains: the ability to discern social influences and resist peer pressure, the capacity for critical thinking and the ability to question information encountered on social media, and the development of adaptive coping mechanisms for stress management and problem-solving. Furthermore, the program should foster positive social norms within the peer group that promote vape- and smoke-free living, while communicating the positive outcomes relevant for the target group. |
| Group-specific behavioral determinants and needs in prevention | Gender-specific motives to vape or smoke, as reported by students and teachers/pedagogues (SBE, EI, SQB): Coping with stress and negative emotions, weight/appetite management (girls); expected status enhancement, such as being cool/belonging/ masculine/impressing girls (boys). Motives to be vape- and smoke-free: avoiding wrinkles and bad smell, disapproval from social environment (girls); fitness/sports motivation (boys).  Communication behavior patterns exhibited during discussions about smoking (SBE, SQB): Timidity (girls) vs. Boastfulness (boys).  SES-specific observations: Students in the less burdened school appeared to have more exposure and knowledge about different smoking/vaping products compared to the lower-SES school with very high strain (SBE).  Students in both schools reported wanting to stay fit as a motive to be vape- and smoke-free. However, almost all students in the less burdened school reported wanting to perform well in at least one club with regular training sessions, such as playing soccer or hockey, whereas none of the students in the lower SES school were current members of sports clubs (SBE, SQB).  Religious beliefs/culture as an important determinant of smoking behavior (SBE, SMR, EI, SQB):  Muslim students referred to smoking/vaping as “harām”/not allowed according to their religion and strictly punished in their families; concluding it is not an option for them; experts reported shaming/bullying of Muslims by their family/friends in response to their smoking; resulting in little consumption or late initiation; water-pipe/hookah being an exception commonly used in many families. | In order to gain a deeper understanding of group-specific needs in prevention, it is imperative to assess SDOH in students and to explore subgroup effects in the evaluation study.  All intervention materials use simple language and incorporate diversity in both words and images, e.g., in the choice of illustrated characters and leisure activities. Furthermore, language/terminology used by the students is used in intervention materials, e.g., when presenting students with phrases to say when being offered to vape or smoke during the refusal skills training. |
| Program ideas, materials and experienced lessons in respect to practicability, expected effectiveness, acceptability and feasibility in the setting of structurally burdened schools | Both children and teachers participating in the material review interviews/feasibility study provided positive feedback on the program (student program acceptability ratings: *M* = 4.32, *SD* = .83 (1 = *did not like the program at all*; 5 = *liked the program very much*).  However, the teachers perceived obtaining parental consent through our written study information as challenging (EI, SQB). Difficulties in understanding the German language were identified as one main reason. | Informed by the various sources of feedback, we deem the program feasible and acceptable and have approved it for the main trial after minor refinement. To simplify the consent process for teachers and to address language barriers, we will provide all information material for parents and students in six languages. Additionally, we will provide teachers with a video introduction to the study (with subtitles) and flyers with concise information. |

Sources as coded as follows: SBE, SMR, EI, SQ

1. SBE = Student belief elicitation study [49] with *N* = 33 students (age *M* = 11.7; 58% female) in grade 6 in two lower SES schools in two different districts of Berlin and varying degree of structural burden (*n* = 13 attending a school with high strain) and 7 (*n* = 20 attending a school with very high strain), respectively)
2. SMR = Student material review interviews (*N* = 32) presenting students with workshop ideas, materials, and questionnaires, or obtaining their feedback immediately after they experienced a workshop in their school class.
3. EI = Semi-structured expert/stakeholder needs assessment and material review/concept interviews (*N* = 7), among whom *N* = 5 teachers/pedagogues/headmasters had experienced the workshops or coordinated the program on school level; informal exchange with *N* = 47stakeholders/experts, e.g., teachers in charge of prevention at their school, researchers in the field of substance use prevention, school intervention, and science didactics; coordinators of school-based prevention on the governmental level, and professional trainers working in smoking prevention or extremism prevention, and social work at lower SES schools.
4. SQFB = Student online-questionnaires including qualitative and quantitative measures filled out by *N* = 92 students and *N* = 4 teachers accompanying the program; as well as general behavior observed during the feasibility testing.

**Table 3**

*Overview of workshop modules, key content, BCTs and targeted theoretical determinant of smoking behavior*.

| Workshop | Content/Key message | Key BCTsa | Key change objective in our assessment modela |
| --- | --- | --- | --- |
| Common techniques and objectives in Core Workshop and Booster |  | Information about antecedents [4.2],  Information about health consequences [5.1], Salience of consequences [5.2], Information about social and environmental consequences [5.3],  Credible source [9.1],  Social reward [10.4],  Framing/reframing [13.2],  *Autonomy-supportive interaction style* [not coded in BCTTv1; see reference 20] | Instrumental/Experiential attitude  Intention  Refusal self-concept/ Self-efficacy to refuse/ Self-efficacy to be vape- and smoke-free  Descriptive/Injunctive norm |
| Core Workshop  Part I | **Future Aspirations:**  Sharing future goals; instructors frame vape- and smoke-free living as an important decision for their future.  Health:  Expert quiz covering cardiovascular system functions; harmful ingredients and health consequences; effects on appearance, general fitness and athletic performance; smoking experiment demonstrating tar deposition in the lungs. | Comparative imagining of future outcomes [9.3],  Imaginary reward [16.2] |  |
| **Social Influences and Refusal Training:**  Sharing experiences with peer pressure; strategies to refuse smoking; action planning using a volitional help sheet; model dialogue by the instructors; role-play exercise of saying ‘no’. | Problem solving [1.2], Action planning [1.4], Commitment [1.9], Instruction on how to perform a behavior [4.1], Demonstration of behavior [6.1], Behavioral practice/rehearsal [8.1], Verbal persuasion about capability [15.1], Prompts/cues [7.1] | Action planning |
| Core Workshop  Part II | **Addiction and well-being:**  Understanding addiction development including the role of social influences; implications for mental well-being.  **Monetary costs:**  Exploring the financial impact of smoking versus being vape- and smoke-free.  **Marketing and Lobbyism:**  Examining tobacco industry influence on tobacco control-policies; manipulative marketing strategies; ethics in advertising. | Information about emotional consequences [5.6], Information about health consequences [5.1],  Information about others’ approval [6.3],  Pros and cons [9.2],  Imaginary reward [16.2] |  |
|  | **Living Vape- and Smoke-Free:**  Normative feedback on the high percentage of vape- and smoke-free students in the class (method adapted from Perkins et al., 2011); Danish campaign presentation: “cool without smoke” [61]; video message from German actor introducing the "photo challenge": taking pictures for an advertising campaign demonstrating the appeal of a vape- and smoke-free life. | Feedback on behavior [2.2],  Information about others’ approval [6.3],  Social comparison [6.2],  Identification of self as role model [13.1],  Identity associated with changed behavior [13.5],  Reward incompatible behavior [14.7],  Prompts/cues [7.1] |  |
| Booster Sessions  (90 minutes led by class teacher,  45 minutes led by study team) | **Recap and Sharing:**  Reflection on the content of previous workshops; sharing experiences with refusing smoking and recapitulating strategies using the volitional helpsheet.  **Poster creation and Presentation:**  Creating and presenting advertisement posters around the theme of being vape- and smoke-free, using photos taken in the Core Workshop Part II. | Problem solving [1.2], Social support [3.1],  Feedback on behavior [2.2],  Social comparison [6.2],  Identification of self as role model [13.1],  Identity associated with changed behavior [13.5],  Reward incompatible behavior [14.7], Action planning [1.4], Commitment [1.9] | Action planning |
|  |  |  |  |
| Life Skills Traininga | **Resources:**  Recognizing personal resources and committing to daily self-care; “Emergency-Powercard” with 24/7 support hotlines.  **Coping and problem solving:**  Action planning for challenging situations and unpleasant emotions; breathing exercise. | Reduce negative emotions [11.2], Problem solving [1.2], Instruction on how to perform a behavior [4.1], Demonstration of behavior [6.1], Behavioral practice/rehearsal [8.1], Action planning [1.4], Commitment [1.9], Prompts/cues [7.1] | Coping with stress  Distress  Action planning |

aThe objective of the life skills training is to cultivate adaptive strategies for coping with stress and problem solving. The interventionists do not mention smoking and vaping; therefore, in the corresponding row of the table, we provide codes for BCTs aimed at fostering adaptive coping with stress and problem solving. With regard to the intervention’s overall goal of students being vape-and smoke-free, the entire session can be coded as the BCT “Reduce negative emotions [11.2]”.
